injury for the lung,<sup>4</sup> kidney,<sup>5</sup> and brain.<sup>6</sup> Furthermore, transient receptor potential vanilloid 1 antagonists may interfere with the agents or interventions administered perioperatively that may decrease organ injury, such as a surgical incision or opioids that appear to provide their protective effect by a transient receptor potential vanilloid 1–dependent mechanism.<sup>7</sup> Therefore, using transient receptor potential vanilloid 1 antagonists for surgeries undergoing organ reperfusion injury or in a patient population with cardiovascular disease who are at higher risk of having an intraoperative myocardial infarction may possibly cause an unwanted side effect of exacerbating organ injury during ischemia-reperfusion or block the abilities for agents we commonly administer in the operating room to limit cellular injury.

Hypothermia induced by transient receptor potential vanilloid 1 activation is also considered as a promising intervention for organ protection. Rinvanil, a transient receptor potential vanilloid 1 agonist, induces mild hypothermia (33°C), which is associated with 34% smaller cerebral infarct size volumes in mice subjected to transient middle cerebral artery occlusion *versus* vehicle-treated controls.<sup>5</sup> Thus, drugs specifically inhibiting transient receptor potential vanilloid 1 may interrupt the benefits of hypothermia associated with organ protection.

In conclusion, it is important to consider whether blocking transient receptor potential vanilloid 1 to reduce opioid requirements or raise body temperature may have some unknown risks.

## Research Support

Funded by National Institutes of Health, Bethesda, Maryland, grant Nos. HL109212 and GM119522 (to Dr. Gross), the Priority Department of Second Affiliated Hospital of Anhui Medical University, Hefei, China (to Dr. Wu), and the China Scholarship Council (201608535052; to Dr. Qian).

## Competing Interests

Dr. Gross holds a U.S. patent titled “Peptide Modulators of Specific Calcineurin Protein–Protein Interactions.” The other authors declare no competing interests.

**Yu Wu, M.D., Eric R. Gross, M.D., Ph.D., Jinqiao Qian, M.D., Ph.D.** Stanford University, Stanford, California, and the First Affiliated Hospital of Kunming Medical University, Kunming, China (J.Q.). qianjinqiao@126.com

## References

- Garami A, Ibrahim M, Gilbraith K, Khanna R, Pakai E, Miko A, Pinter E, Romanovsky AA, Porreca F, Patwardhan AM: Transient receptor potential vanilloid 1 antagonists prevent anesthesia-induced hypothermia and decrease postincisional opioid dose requirements in rodents. *ANESTHESIOLOGY* 2017; 127:813–23
- Wang L, Wang DH: TRPV1 gene knockout impairs postischemic recovery in isolated perfused heart in mice. *Circulation* 2005; 112:3617–23
- Wang Y, Babánková D, Huang J, Swain GM, Wang DH: Deletion of transient receptor potential vanilloid type 1 receptors exaggerates renal damage in deoxycorticosterone acetate-salt hypertension. *Hypertension* 2008; 52:264–70
- Wang M, Ji P, Wang R, Zhao L, Xia Z: TRPV1 agonist capsaicin attenuates lung ischemia-reperfusion injury in rabbits. *J Surg Res* 2012; 173:153–60
- Chen L, Markó L, Kaßmann M, Zhu Y, Wu K, Gollasch M: Role of TRPV1 channels in ischemia/reperfusion-induced acute kidney injury. *PLoS One* 2014; 9:e109842
- Muzzi M, Felici R, Cavone L, Gerace E, Minassi A, Appendino G, Moroni F, Chiarugi A: Ischemic neuroprotection by TRPV1 receptor-induced hypothermia. *J Cereb Blood Flow Metab* 2012; 32:978–82
- Heymann HM, Wu Y, Lu Y, Qvit N, Gross GJ, Gross ER: Transient receptor potential vanilloid 1 inhibitors block laparotomy- and opioid-induced infarct size reduction in rats. *Br J Pharmacol* 2017; 174:4826–35

(Accepted for publication May 8, 2018.)

## In Reply:

We thank Wu *et al.* for their thoughtful comments on our article, in which we proposed the novel concept of intraoperative use of transient receptor potential vanilloid 1 antagonists as a pharmacologic therapy for anesthesia-induced hypothermia.<sup>1</sup> Wu *et al.* point out that as transient receptor potential vanilloid 1 may play a critical role in ischemia-reperfusion injury, perioperative blockade of transient receptor potential vanilloid 1 might have deleterious consequences. We believe this may not be a significant concern regarding our proposed use of intraoperative transient receptor potential vanilloid 1 antagonists for several reasons.

First, we are proposing the possibility of the use of transient receptor potential vanilloid 1 antagonists to “prevent” anesthesia-induced hypothermia to ensure normothermia, not to cause hyperthermia. Our data in preclinical models support this outcome. We realize that there are specific surgical cases where hypothermia may be beneficial (*e.g.*, cardiac arrest). In these circumstances, transient receptor potential vanilloid 1 antagonists would simply be avoided as maintaining normothermia is not the desired medical outcome.

Second, whether hypothermia is beneficial as a protection strategy for organs such as the brain remains uncertain.<sup>2,3</sup> Current guidelines recommend maintenance of normothermia in most surgical cases given the preponderance of evidence in favor of normothermia.<sup>4,5</sup>

Third, the overall effect of transient receptor potential vanilloid 1 antagonism on various organ systems is likely complex and dependent on the particular preclinical model being studied. For example, while the articles cited by Wu *et al.* demonstrate a protective role of transient receptor potential vanilloid 1 agonism in postischemic recovery, others have shown that transient receptor potential vanilloid 1 antagonism may have protective role in ischemia-reperfusion in cardiac myocytes<sup>6</sup> and in the brain,<sup>7</sup> as well as in models of hemorrhagic shock, cardiac hypertrophy,<sup>8,9</sup> and lung injury.<sup>10</sup> These differences could be secondary to the relative lack of specificity of the antagonist studied (*i.e.*, capsazepine) or unknown compensation in the global knockout phenotype. Notably, in our studies, we observed increased anesthesia-induced hypothermia in transient receptor potential vanilloid 1 knockout mice, and capsazepine had only modest efficacy in preventing

anesthesia-induced hypothermia (Patwardhan *et al.*, unpublished data). As is the case with any drug development, potential adverse effects on organ function can be monitored during clinical testing. Initial studies would be done in patients who are otherwise relatively young and healthy; later studies would be done in specific “at-risk” populations with careful monitoring.

Finally, preclinical literature has suggested a role for transient receptor potential vanilloid 1 in numerous, diverse biologic processes such as immune modulation, renal injury, anxiety, dementia, cognitive function, pancreatic function, airway reactivity, pulmonary hypertension, and gastrointestinal transit, to name a few. Anticipation of all possible side effects of transient receptor potential vanilloid 1 antagonism is not possible. Like all pharmacologic therapies, risks will have to be weighed against benefits in specific patient populations and with use in specific circumstances. Importantly, however, multiple transient receptor potential vanilloid 1 antagonists have been advanced past phase I safety studies and evaluated further in clinical settings where the only reported outcomes were analgesia, decreased thermal sensation that is not a problem in the intraoperative setting, and hyperthermia. We look forward to clinical evaluation of transient receptor potential vanilloid 1 antagonists for perioperative use.

### Research Support

This research has been supported by a Foundation for Anesthesia Education and Research grant (to Dr. Patwardhan) and a University of Arizona, Tucson, Arizona, Career Development grant (to Dr. Patwardhan) and in part by the Research Fund of the Medical School, University of Pecs, Pecs, Hungary (grant No. KA-2016-15, to Dr. Garami) and the New National Excellence Program of the Hungarian Ministry of Human Capacities (grant No. UNKP-16-4-III, to Dr. Garami).

### Competing Interests

Drs. Patwardhan and Porreca declare a financial interest in Catalina Pharmaceuticals Inc. (Tucson, Arizona), which licenses the intellectual property involved in this research. This interest has been properly disclosed to the University of Arizona Institutional Review Committee, Tucson, Arizona, and is managed in accordance with its conflict of interest policies. Drs. Patwardhan, Porreca, and Romanovsky are founders of Catalina Pharmaceuticals Inc. and hold a provisional patent for the use of transient receptor potential vanilloid 1 antagonists in prevention of anesthesia-induced hypothermia. Dr. Romanovsky has consulted for Abbott Laboratories (Chicago, Illinois), AbbVie (Chicago, Illinois), Amgen Inc. (Thousand Oaks, California), Japan Tobacco Inc. (Tokyo, Japan), Teva Pharmaceutical Industries Ltd. (Petah Tikva, Israel), and other pharmaceutical companies, and his research has been supported by Abbott Laboratories, AbbVie, and Amgen Inc. The other authors declare no competing interests.

**Andras Garami, M.D., Ph.D., Mohab Ibrahim, M.D., Ph.D., Kerry Gilbraith, B.S., Rajesh Khanna, Ph.D., Eszter Pakai, M.S., Alexandra Miko, M.D., Erika Pinter, M.D., Ph.D., D.Sc., Andrej A. Romanovsky, M.D., Ph.D., Frank Porreca, Ph.D., Amol M. Patwardhan, M.D., Ph.D.** University of Arizona, Tucson, Arizona (A.M.P.). apatwardhan@anesth.arizona.edu

### References

1. Garami A, Ibrahim M, Gilbraith K, Khanna R, Pakai E, Miko A, Pinter E, Romanovsky AA, Porreca F, Patwardhan AM: Transient receptor potential vanilloid 1 antagonists prevent anesthesia-induced hypothermia and decrease postincisional opioid dose requirements in rodents. *ANESTHESIOLOGY* 2017; 127: 813–23
2. Andrews PJ, Sinclair HL, Rodriguez A, Harris BA, Battison CG, Rhodes JK, Murray GD; Eurotherm3235 Trial Collaborators: Hypothermia for intracranial hypertension after traumatic brain injury. *N Engl J Med* 2015; 373:2403–12
3. Todd MM, Hindman BJ, Clarke WR, Torner JC; Intraoperative Hypothermia for Aneurysm Surgery Trial (IHAST) Investigators: Mild intraoperative hypothermia during surgery for intracranial aneurysm. *N Engl J Med* 2005; 352:135–45
4. Hopf HW: Perioperative temperature management: Time for a new standard of care? *ANESTHESIOLOGY* 2015; 122:229–30
5. American Society of Anesthesiologists Task Force on Postanesthetic Care: Practice guidelines for postanesthetic care: A report by the American Society of Anesthesiologists Task Force on Postanesthetic Care. *ANESTHESIOLOGY* 2002; 96: 742–52
6. Sun Z, Han J, Zhao W, Zhang Y, Wang S, Ye L, Liu T, Zheng L: TRPV1 activation exacerbates hypoxia/reoxygenation-induced apoptosis in H9C2 cells via calcium overload and mitochondrial dysfunction. *Int J Mol Sci* 2014; 15:18362–80
7. Miyanohara J, Shirakawa H, Sanpei K, Nakagawa T, Kaneko S: A pathophysiological role of TRPV1 in ischemic injury after transient focal cerebral ischemia in mice. *Biochem Biophys Res Commun* 2015; 467:478–83
8. Akabori H, Yamamoto H, Tsuchihashi H, Mori T, Fujino K, Shimizu T, Endo Y, Tani T: Transient receptor potential vanilloid 1 antagonist, capsazepine, improves survival in a rat hemorrhagic shock model. *Ann Surg* 2007; 245:964–70
9. Buckley CL, Stokes AJ: Mice lacking functional TRPV1 are protected from pressure overload cardiac hypertrophy. *Channels (Austin)* 2011; 5:367–74
10. Thomas KC, Roberts JK, Deering-Rice CE, Romero EG, Dull RO, Lee J, Yost GS, Reilly CA: Contributions of TRPV1, endovanilloids, and endoplasmic reticulum stress in lung cell death *in vitro* and lung injury. *Am J Physiol Lung Cell Mol Physiol* 2012; 302:L111–9

(Accepted for publication May 8, 2018.)

## Postoperative Analgesia after Shoulder Surgery

### To the Editor:

Dr. Hussain *et al.* have recently published a review and meta-analysis on suprascapular and interscalene nerve blocks for shoulder surgery.<sup>1</sup> The primary objective of the study was to compare postoperative analgesic efficacy between the interscalene nerve block and the suprascapular nerve block. We would like to comment on this very interesting research question.

It is well accepted that the shoulder joint is mainly innervated by the suprascapular and the axillary nerve, but receives contributions from the subscapular and the lateral pectoral nerves.<sup>2–4</sup> Two nerves provide the cutaneous innervation of
